# Supplementary material for: Caveolae-mediated albumin transcytosis is enhanced in dengue-infected human endothelial cells: A model of vascular leakage in dengue hemorrhagic fever
Source: PubMed Central journal article supplement (PMC4992822; doi:10.1038/srep31855), 2016-08-22
Supplement: srep31855-s1.pdf [file srep31855-s1.pdf]

# Caveolae-mediated albumin transcytosis is enhanced in dengue-infected human endothelial cells: A model of vascular leakage in dengue hemorrhagic fever

*Chanettee Chanthick, Rattiyaporn Kanlaya, Rattanaporn Kiatbumrung, Sa-nga Pattanakitsakul, and Visith Thongboonkerd*

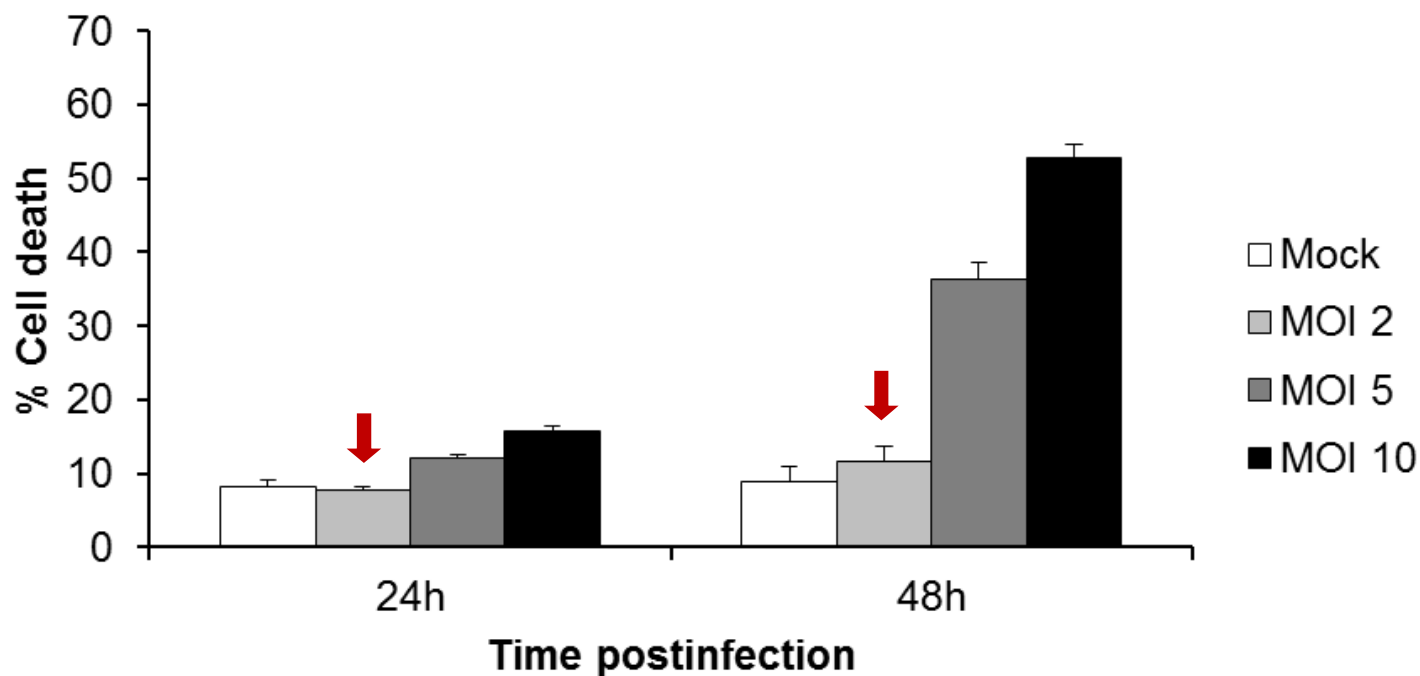

**Supplementary Figure S1:** Cell death was quantitated by flow cytometry using Annexin V/propidium iodide co-staining. Percentage of cell death was calculated using the formula: % cell death = [(no. of total cell death (apoptosis + necrosis)/no. of total cells) x 100%] (n = 3 independent experiments). Arrows indicate the optimal MOI (2.0) selected for all subsequent experiments.
